# Supplementary material for: Enhanced charge transport in Al-doped ZnO nanotubes designed via simultaneous etching and Al doping of H2O-oxidized ZnO nanorods for solar cell applications
Source: Royal Society of Chemistry journal article supplement (doi:10.1039/c9tc00401g), 2019-01-01
Supplement: c9tc00401g1.pdf [file c9tc00401g1.pdf]

## Supporting Information

Enhanced Charge Transport in Al-doped ZnO Nanotubes Designed via Simultaneous Etching and Al  
Doping of H<sub>2</sub>O-Oxidized ZnO Nanorods for Solar Cell Applications

*Christian Mark Pelicano*\*<sup>1</sup> and *Hisao Yanagi*<sup>2</sup>

<sup>1</sup> Graduate School of Materials Science, Nara Institute of Science and Technology

Takayama 8916-5, Ikoma City, Nara 630-0192, Japan

<sup>2</sup> Graduate School of Science and Technology, Nara Institute of Science and Technology

Takayama 8916-5, Ikoma City, Nara 630-0192, Japan

\*Email - christian.pelicano.ce0@ms.naist.jp, christian.mark.o.pelicano@gmail.com

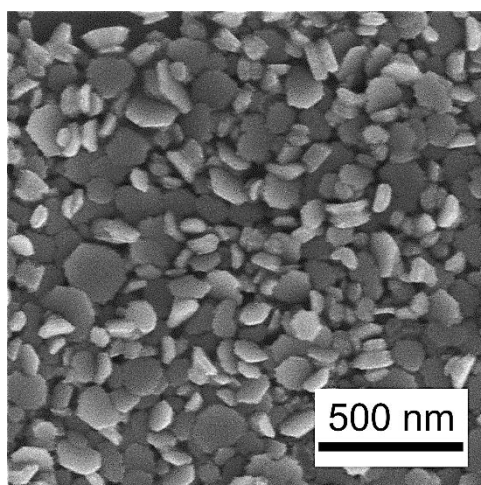

Figure S1. SEM image of a thermally evaporated Zn thin film.

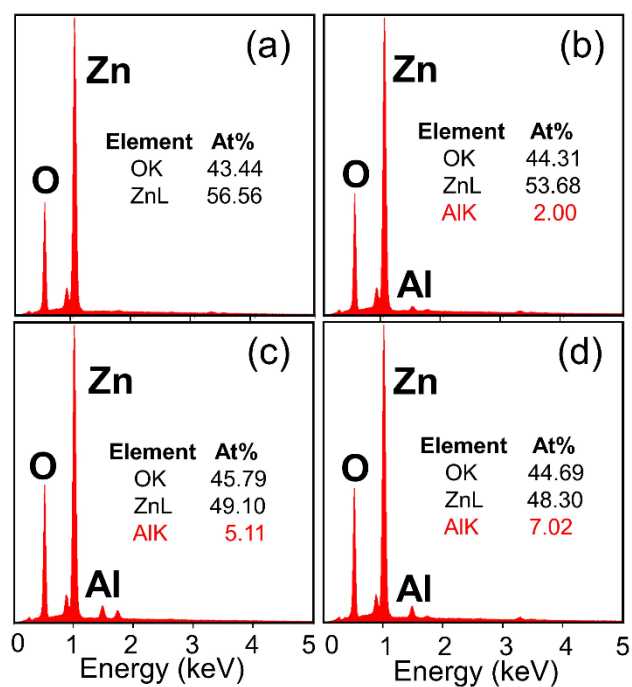

Figure S2. EDX measurements of (a) ZnO NRs formed after H<sub>2</sub>O oxidation at 90 °C for 8 h and AZO NTs formed after (b) 1, (c) 2, and (d) 3 AlCl<sub>3</sub> coatings.

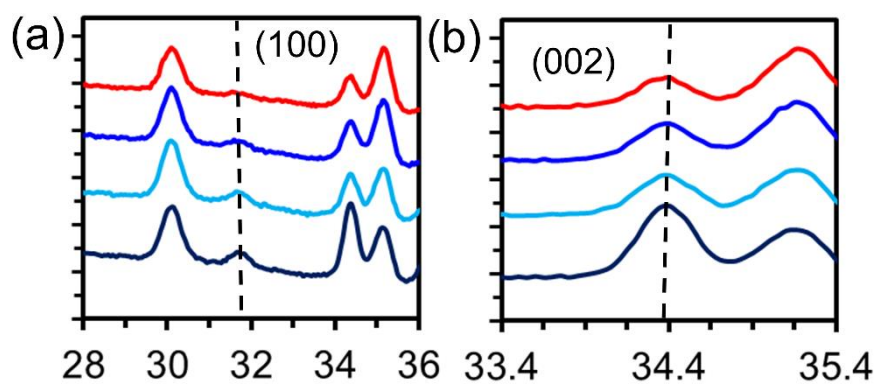

Figure S3. XRD patterns of ZnO NRs and AZO NTs magnified at (100) and (002) diffraction peaks.

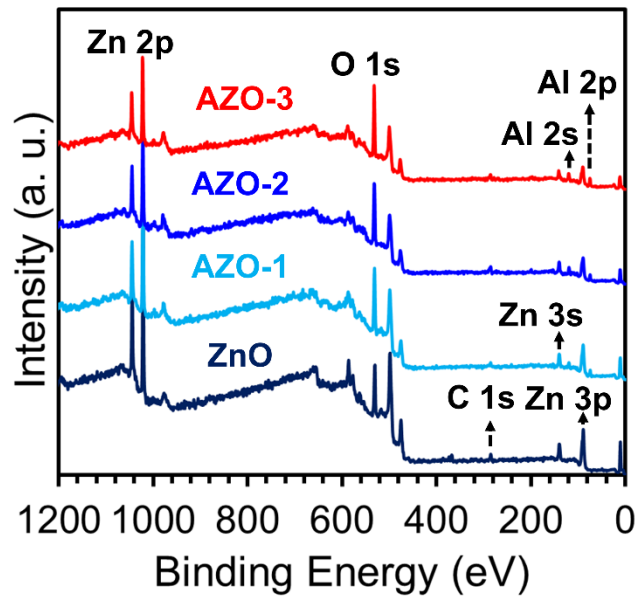

Figure S4. XPS survey spectra of ZnO NRs and AZO NTs.
